# Supplementary material for: Gastrointestinal microbiota composition predicts peripheral inflammatory state during treatment of human tuberculosis
Source: PubMed Central journal article supplement (PMC7892575; doi:10.1038/s41467-021-21475-y), 2021-02-18
Supplement: 41467_2021_21475_MOESM2_ESM.pdf [file 41467_2021_21475_MOESM2_ESM.pdf]

## **Description of Additional Supplementary Files**

File Name: Supplementary Data 1

Description: Table reporting first and late date of enrolment for each study Cohort.

File Name: Supplementary Data 2

Description: Results from Linear Mixed Effect Modelling predicting TTP for the HRZE/NTZ Cohort.

File Name: Supplementary Data 3

Description: Results from Linear Mixed Effect Modelling predicting microbiome Diversity for the HRZE/NTZ Cohort.

File Name: Supplementary Data 4

Description: Results PERMANOVA analysis on microbiota abundance for the HRZE/NTZ study Cohort.

File Name: Supplementary Data 5

Description: Results from differential analysis using limma/voom to determine bacteria that are affected by NTZ and HRZE treatment.

File Name: Supplementary Data 6

Description: MiSigDB Hallmark pathways affected by NTZ and HRZE treatment for the HRZE/NTZ study Cohort.

File Name: Supplementary Data 7

Description: TB inflammatory transcripts that are affected by HRZE for the HRZE/NTZ study Cohort.

File Name: Supplementary Data 8

Description: TB inflammatory transcripts that are affected by NTZ for the HRZE/NTZ study Cohort.

File Name: Supplementary Data 9

Description: IBD-associated transcripts that are affected by HRZE for the HRZE/NTZ study Cohort.

File Name: Supplementary Data 10

Description: IBD-associated transcripts that are affected by NTZ for the HRZE/NTZ study Cohort.

File Name: Supplementary Data 11

Description: Results from Linear Mixed Effect Modelling predicting TTP for the Longitudinal Observational Cohort.

File Name: Supplementary Data 12

Description: Results from Linear Mixed Effect Modelling predicting microbiota Diversity for the Longitudinal Observational Cohort.

File Name: Supplementary Data 13

Description: Results from differential analysis using limma/voom to determine bacteria that are affected by HRZE treatment for the Longitudinal Observational Cohort.

File Name: Supplementary Data 14

Description: Results from differential analysis using limma/voom to determine host transcripts that are affected by HRZE treatment for the Longitudinal Observational Cohort.

File Name: Supplementary Data 15

Description: MiSigDB Hallmark pathways that are affected by HRZE for the Longitudinal Observational Cohort.

File Name: Supplementary Data 16

Description: TB inflammatory transcripts that are affected by HRZE for the Longitudinal Observational Cohort.

File Name: Supplementary Data 17

Description: IBD inflammatory transcripts that are affected by HRZE for the Longitudinal Observational Cohort.

File Name: Supplementary Data 18

Description: Results from Random Forest Regression analysis to predict changes in inflammatory pathways from changes in microbiota.

File Name: Supplementary Data 19

Description: Results from linear mixed effect modelling to regress the Euclidean distance between every pair of FC/CC and pre-treatment or during treatment samples against Time, Treatment and patient ID for the HRZE/NTZ trial.

File Name: Supplementary Data 20

Description: Results from linear mixed effect modelling to regress the Euclidean distance between every pair of FC/CC and pre-treatment or during treatment samples against Time, Treatment and patient ID for the Longitudinal Observational Cohort.

File Name: Supplementary Data 21

Description: Results from Random Forest Regression analysis to predict changes inflammatory pathways from changes microbiota abundance in the Family Contact/Community Control Cohort.
